# Supplementary material for: How Gut Microbiome and Blood Metabolites Drive Ossification of the Posterior Longitudinal Ligament of the Spine: A Genome-Wide Association Study Based on the East Asian Population
Source: Research Square preprint supplement (doi:10.21203/rs.3.rs-7893117/v1), 2025-11-14
Supplement: Supplementary file 1 [file 9cadf9ea8320d2cd48fa915e.xlsx]

## Sheet: Supplementary Table S1
Supplementary Table 1：Heterogeneity and pleiotropy in MR analyses
HETEROGENEITY
exposure	outcome	method	Q	Q_df	Q_pvalue
c_Bacilli	OPLL	MR Egger	14.8802884352889	21	0.828910321241171
c_Bacilli	OPLL	IVW	16.2402477876567	22	0.803785812015985
g_Megasphaera	OPLL	MR Egger	19.4760310149505	22	0.615778685617537
g_Megasphaera	OPLL	IVW	19.8452843591392	23	0.651226049673872
s_Prevotella_oris	OPLL	MR Egger	8.92015622748006	10	0.539697484775935
s_Prevotella_oris	OPLL	IVW	9.0094574343546	11	0.621019325072505
MF0036	OPLL	MR Egger	17.4050884006058	16	0.359863619948932
MF0036	OPLL	IVW	18.6101939971711	17	0.351359814616077
MF0052	OPLL	MR Egger	8.56179111634609	14	0.858057230822966
MF0052	OPLL	IVW	14.7768415135604	15	0.467608054010916
MF0074	OPLL	MR Egger	10.9137742653004	13	0.618040959728535
MF0074	OPLL	IVW	10.9326206112565	14	0.691320917614935
MF0059	OPLL	MR Egger	10.6778282440716	14	0.711139165114256
MF0059	OPLL	IVW	11.3531582135287	15	0.727181505523129
o_Erysipelotrichales	OPLL	MR Egger	18.6957201962805	24	0.768016122054565
o_Erysipelotrichales	OPLL	IVW	20.093686555476	25	0.74189371408937
log_s_Clostridium_hylemonae	OPLL	MR Egger	11.3041123374976	10	0.334320887638189
log_s_Clostridium_hylemonae	OPLL	IVW	12.2418989348168	11	0.345737925703815
s_Enterococcus_faecalis	OPLL	MR Egger	9.02368279338511	21	0.989026496517701
s_Enterococcus_faecalis	OPLL	IVW	9.35749191560581	22	0.991254521430101
log_s_Acidaminococcus_intestini	OPLL	MR Egger	5.10434407685704	9	0.825119072695502
log_s_Acidaminococcus_intestini	OPLL	IVW	5.11957103781835	10	0.883049
log_s_Neisseria_subflava	OPLL	MR Egger	9.17252626694311	10	0.515812337877834
log_s_Neisseria_subflava	OPLL	IVW	10.0589768570989	11	0.525090077374545
log_s_Neisseria_gonorrhoeae	OPLL	MR Egger	5.43264137461702	10	0.860469579887396
log_s_Neisseria_gonorrhoeae	OPLL	IVW	5.47227210383564	11	0.906159334797276
g_Anaerococcus	OPLL	MR Egger	28.9033359624175	26	0.315496327986079
g_Anaerococcus	OPLL	IVW	29.1508496039245	27	0.353622547226703
s_unclassified_Clostridium_sp._D5	OPLL	MR Egger	11.2266980966367	14	0.668142354264317
s_unclassified_Clostridium_sp._D5	OPLL	IVW	11.2419774493267	15	0.735259960208793
s_Enterococcus_faecium	OPLL	MR Egger	29.6078225861598	24	0.198091586837483
s_Enterococcus_faecium	OPLL	IVW	30.6163843178973	25	0.202037120854492
s_Bacteroides_dorei	OPLL	MR Egger	6.93388057779534	11	0.804412421224179
s_Bacteroides_dorei	OPLL	IVW	7.55390124133872	12	0.818948476035102
s_[Clostridium]_difficile	OPLL	MR Egger	4.90739140741786	7	0.671263692793719
s_[Clostridium]_difficile	OPLL	IVW	4.9087190060501	8	0.767286361256975
log_s_Enterobacter_asburiae	OPLL	MR Egger	12.3691918183485	15	0.650896446401559
log_s_Enterobacter_asburiae	OPLL	IVW	12.4070727636472	16	0.715514673905065
s_Prevotella_tannerae	OPLL	MR Egger	9.85452542914504	13	0.705784877612527
s_Prevotella_tannerae	OPLL	IVW	10.815035435242	14	0.700501518114692
s_Bacteroides_caccae	OPLL	MR Egger	17.5283911479349	13	0.176260673937181
s_Bacteroides_caccae	OPLL	IVW	18.3458728458558	14	0.191479
s_Parabacteroides_distasonis	OPLL	MR Egger	14.2078168987437	19	0.771444627614463
s_Parabacteroides_distasonis	OPLL	IVW	14.3680754258525	20	0.811354137237438
HORIZONTAL PLEIOTROPY
exposure	outcome	egger_intercept	se	pvalue	presso
c_Bacilli	OPLL	-0.0354002	0.0303558879675161	0.256618454274996	0.831
g_Megasphaera	OPLL	0.015373198462006	0.025298921948066	0.549633312246276	0.664
s_Prevotella_oris	OPLL	-0.012254	0.0410060970708692	0.771185226586723	0.675
MF0036	OPLL	0.0360152570252697	0.034217800680723	0.308193	0.412
MF0052	OPLL	-0.0922371	0.0369984308999588	0.025813290794233	0.454
MF0074	OPLL	0.00385142526559829	0.0280548464169008	0.892911324426434	0.715
MF0059	OPLL	0.0218029147167144	0.0265311786815725	0.424974082508904	0.627
Erysipelotrichales	OPLL	0.0273214518386413	0.023107630444627	0.24864637008574	0.777
log_s_Clostridium_hylemonae	OPLL	-0.0505188	0.0554650555201017	0.383818774302471	0.366
s_Enterococcus_faecalis	OPLL	0.0142795095808205	0.0247152035621229	0.569568572498837	0.998
log_s_Acidaminococcus_intestini	OPLL	0.00776359617181038	0.0629153069919546	0.904504087386194	0.884
log_s_Neisseria_subflava	OPLL	-0.0486698	0.0516930294827397	0.368628850812068	0.567
log_s_Neisseria_gonorrhoeae	OPLL	-0.00877922	0.0441001307944803	0.846193722034715	0.922
Anaerococcus	OPLL	0.0128714842022165	0.0272782414811505	0.640963496133062	0.33
s_unclassified_Clostridium_sp._D5	OPLL	-0.0263402	0.0227289675373103	0.263508760389932	0.73
s_Enterococcus_faecium	OPLL	0.0235123355041753	0.0260041187991092	0.374888346270422	0.232
s_Bacteroides_dorei	OPLL	0.0308142794397469	0.0391335219013093	0.447674108546014	0.853
s_[Clostridium]_difficile	OPLL	-0.00139466	0.0382766092417666	0.97195182075489	0.818
log_s_Enterobacter_asburiae	OPLL	-0.00879262	0.0451760315321003	0.848293945505197	0.72
s_Prevotella_tannerae	OPLL	0.0274619470852546	0.0280207902528069	0.34494610560416	0.656
s_Bacteroides_caccae	OPLL	0.0263256008082678	0.03380949035268	0.450129995375677	0.185
s_Parabacteroides_distasonis	OPLL	-0.0138344	0.0345579749870421	0.693383994480223	0.808

## Sheet: Supplementary Table S2
Supplementary Table 2：Reverse Mendelian randomization
exposure	outcome	method	nsnp	b	se	pval	lo_ci	up_ci	or	or_lci95	or_uci95
OPLL	c_Bacilli	IVW	50	0.00961868910007132	0.0254626032784007	0.705610755885212	-0.040288	0.0595253915257367	1.00966509736629	0.960512758836479	1.06133270949421
OPLL	g_Megasphaera	IVW	50	-0.0109942	0.0495657168952906	0.824462083100789	-0.108143	0.0861546518257516	0.989066061541867	0.897499282194071	1.08997488187674
OPLL	log_s_Acidaminococcus_intestini	IVW	50	-0.0992508	0.0625301081119879	0.112456579209533	-0.22181	0.0233082482282644	0.905515609132159	0.801067732494349	1.02358200826391
OPLL	log_s_Clostridium_hylemonae	IVW	50	-0.0276085	0.0602435805727804	0.646750618059661	-0.145686	0.0904689333803223	0.972769146413399	0.864429175621264	1.09468749887319
OPLL	log_s_Enterobacter_asburiae	IVW	50	0.0131945086137583	0.0598178565353122	0.825420961590791	-0.104048	0.13043750742297	1.01328194025855	0.901181597889893	1.13932673820485
OPLL	log_s_Neisseria_gonorrhoeae	IVW	50	0.0757474368176947	0.0602928202396553	0.208997804204494	-0.0424265	0.193921364487419	1.07869010234559	0.958460918576931	1.21400081562631
OPLL	log_s_Neisseria_subflava	IVW	50	-0.0186998	0.0600144209676693	0.755353917628737	-0.136328	0.0989285124210097	0.981474002951383	0.872556371544787	1.10398737535317
OPLL	MF0036	IVW	50	-0.00309519	0.0126897226161005	0.80729834681161	-0.027967	0.0217766704095591	0.996909599231687	0.972420415066382	1.02201551267559
OPLL	MF0052	IVW	50	0.0358267043272946	0.0530452654610729	0.499422479320608	-0.068142	0.139795424630997	1.03647621408385	0.934127803084727	1.15003850523883
OPLL	MF0059	IVW	50	0.00847110568654974	0.0350955680869652	0.80926640957057	-0.0603162	0.0772584191370015	1.00850708703115	0.94146678740427	1.08032121599986
OPLL	MF0074	IVW	50	-0.00280091	0.00474895925434358	0.555329064613262	-0.0121089	0.00650705458088475	0.997203013318688	0.987964151602043	1.00652827145537
OPLL	o_Erysipelotrichales	IVW	50	0.00153883399298174	0.0221737894170906	0.944672197864469	-0.0419218	0.0449994612504793	1.00154001860557	0.958944773580219	1.04602729636186
OPLL	s_[Clostridium]_difficile	IVW	50	-0.00666424	0.0179598968116808	0.710591027750734	-0.0418656	0.0285371546684915	0.993357913738725	0.95899862217251	1.02894824035508
OPLL	s_Bacteroides_caccae	IVW	50	-0.0282035	0.0511035805537389	0.581024662759879	-0.128367	0.0719595331209703	0.972190520713579	0.879530969635431	1.07461185699591
OPLL	s_Enterococcus_faecalis	IVW	50	-0.0421419	0.0274552757260061	0.124801244099311	-0.0959542	0.0116704387077778	0.958733724959464	0.908505586390712	1.01173880396961
OPLL	s_Enterococcus_faecium	IVW	50	0.00705118048542904	0.0246665746357163	0.774985554312239	-0.0412953	0.055397666771433	1.00707609859147	0.959545728685242	1.05696084932176
OPLL	s_Parabacteroides_distasonis	IVW	50	-0.0423668	0.0262875487379191	0.107034036356881	-0.0938904	0.00915677410466824	0.958518111100286	0.910382519269799	1.00919882561473
OPLL	s_Prevotella_oris	IVW	50	-0.0135168	0.0302762716082862	0.655272676786942	-0.0728583	0.0458246699454132	0.986574119626929	0.929732550074538	1.04689084343623
OPLL	s_Prevotella_tannerae	IVW	50	-0.00706461	0.0458247037904498	0.877478911594261	-0.096881	0.0827518117405448	0.992960287991592	0.907663987110159	1.08627217508926
OPLL	s_unclassified_Clostridium_sp._D5	IVW	50	-0.0247675	0.0295310201729196	0.401640634083493	-0.0826483	0.0331132884264527	0.975536687105099	0.920674881839253	1.03366763518824
exposure	outcome	method	nsnp	b	se	pval	lo_ci	up_ci	or	or_lci95	or_uci95
OPLL	g_Anaerococcus	IVW	50	-0.149788	0.0486427568841101	0.00207450992755181	-0.245128	-0.0544484	0.86089029353646	0.782604355607531	0.947007376326133
OPLL	s_Bacteroides_dorei	IVW	50	-0.0761657	0.034581905150934	0.027631911367023	-0.143946	-0.00838518	0.926662633029033	0.865934292580024	0.991649877837519
HETEROGENEITY
exposure	outcome	method	Q	Q_df	Q_pval
OPLL	c_Bacilli	MR Egger	36.8486481313541	48	0.879207618642073
OPLL	c_Bacilli	IVW	37.6354722591815	49	0.881456041695018
OPLL	g_Anaerococcus	MR Egger	41.9634560735512	48	0.717408519613604
OPLL	g_Anaerococcus	IVW	42.0914908368677	49	0.747110085659635
OPLL	g_Megasphaera	MR Egger	36.8515974841497	48	0.879135390654702
OPLL	g_Megasphaera	IVW	36.8527707691549	49	0.899256200745983
OPLL	log_s_Acidaminococcus_intestini	MR Egger	52.4994272070901	48	0.303904714406527
OPLL	log_s_Acidaminococcus_intestini	IVW	53.2291681085886	49	0.314745895702633
OPLL	log_s_Clostridium_hylemonae	MR Egger	39.6632896173106	48	0.798608662323893
OPLL	log_s_Clostridium_hylemonae	IVW	39.696645791218	49	0.825961423979509
OPLL	log_s_Enterobacter_asburiae	MR Egger	44.5412416751975	48	0.61536809448152
OPLL	log_s_Enterobacter_asburiae	IVW	44.5609864052574	49	0.653498697930746
OPLL	log_s_Neisseria_gonorrhoeae	MR Egger	48.2764328418788	48	0.461666901979844
OPLL	log_s_Neisseria_gonorrhoeae	IVW	48.4064071715969	49	0.497099503651099
OPLL	log_s_Neisseria_subflava	MR Egger	35.9890224349302	48	0.899130132673138
OPLL	log_s_Neisseria_subflava	IVW	36.0934393393891	49	0.914787806732885
OPLL	MF0036	MR Egger	58.7571972980583	48	0.137394262117792
OPLL	MF0036	IVW	59.8560498137749	49	0.137642395429987
OPLL	MF0052	MR Egger	51.7726478618101	48	0.328857454217038
OPLL	MF0052	IVW	52.5991729980513	49	0.33649802913422
OPLL	MF0059	MR Egger	50.3111769397602	48	0.382072935530977
OPLL	MF0059	IVW	51.3010772419967	49	0.38359532419631
OPLL	MF0074	MR Egger	39.9273512655571	48	0.789915606825113
OPLL	MF0074	IVW	40.0514259215873	49	0.815195448990146
OPLL	o_Erysipelotrichales	MR Egger	32.1644511353259	48	0.961509866231489
OPLL	o_Erysipelotrichales	IVW	34.2014948513927	49	0.94628532348488
OPLL	s_[Clostridium]_difficile	MR Egger	43.3264713919948	48	0.664486617578762
OPLL	s_[Clostridium]_difficile	IVW	44.0416245427672	49	0.673950192485143
OPLL	s_Bacteroides_caccae	MR Egger	46.8963772481128	48	0.51805557986002
OPLL	s_Bacteroides_caccae	IVW	47.4429548442743	49	0.53641071829034
OPLL	s_Bacteroides_dorei	MR Egger	34.3972380903027	48	0.930128516831108
OPLL	s_Bacteroides_dorei	IVW	34.4300948161094	49	0.943004017482749
OPLL	s_Enterococcus_faecalis	MR Egger	59.9484473367934	48	0.115526934268379
OPLL	s_Enterococcus_faecalis	IVW	60.2096962508435	49	0.130894321922156
OPLL	s_Enterococcus_faecium	MR Egger	36.7945144407879	48	0.88052862363945
OPLL	s_Enterococcus_faecium	IVW	40.4590840122451	49	0.802410072355392
OPLL	s_Parabacteroides_distasonis	MR Egger	48.1798665046626	48	0.465565549923919
OPLL	s_Parabacteroides_distasonis	IVW	49.4730633855597	49	0.454227192840723
OPLL	s_Prevotella_oris	MR Egger	51.1127716541846	48	0.352408352312196
OPLL	s_Prevotella_oris	IVW	51.3894914960033	49	0.380297522566284
OPLL	s_Prevotella_tannerae	MR Egger	45.9405109509536	48	0.55761527640502
OPLL	s_Prevotella_tannerae	IVW	46.7943659519312	49	0.562997309522544
OPLL	s_unclassified_Clostridium_sp._D5	MR Egger	37.8281801801538	48	0.85377431193403
OPLL	s_unclassified_Clostridium_sp._D5	IVW	39.0375717847462	49	0.845037734647952
HORIZONTAL PLEIOTROPY
exposure	outcome	egger_intercept	se	pval
OPLL	c_Bacilli	0.0182973536138531	0.0206276354140599	0.379485171763082
OPLL	g_Anaerococcus	0.0141017722149588	0.0394103002677504	0.722047136157308
OPLL	g_Megasphaera	0.00137544691903758	0.0401552260138203	0.972817252696604
OPLL	log_s_Acidaminococcus_intestini	0.0415134178927675	0.0508230600963059	0.418065585881891
OPLL	log_s_Clostridium_hylemonae	-0.00892712	0.0488790818808963	0.855852276428372
OPLL	log_s_Enterobacter_asburiae	0.00681119283084272	0.0484727406442043	0.888840376329769
OPLL	log_s_Neisseria_gonorrhoeae	-0.0176064	0.0489765225158968	0.7208083809986
OPLL	log_s_Neisseria_subflava	0.0157097070065577	0.0486163867615182	0.747995761285793
OPLL	MF0036	0.00974971322218374	0.0102903952324015	0.34815135328013
OPLL	MF0052	0.0377089382234103	0.0430770387629639	0.3857246649628
OPLL	MF0059	0.0276457659612454	0.0284475270139713	0.336013972056947
OPLL	MF0074	-0.00135508	0.00384701361995846	0.726198437369657
OPLL	o_Erysipelotrichales	0.0256364511065495	0.0179621256595953	0.15998111929401
OPLL	s_[Clostridium]_difficile	0.0123051856144011	0.0145508592865613	0.401934412341287
OPLL	s_Bacteroides_caccae	0.0306046947783205	0.0413963585112509	0.463319779853241
OPLL	s_Bacteroides_dorei	-0.00507781	0.0280133248867925	0.856923423941103
OPLL	s_Enterococcus_faecalis	0.0102552383101809	0.0224226460241981	0.649475201478578
OPLL	s_Enterococcus_faecium	0.0382544267638074	0.0199834382546983	0.0615524629599546
OPLL	s_Parabacteroides_distasonis	0.0240962410458828	0.021228981190435	0.261985036324423
OPLL	s_Prevotella_oris	-0.0125982	0.0247134058360422	0.612547138502203
OPLL	s_Prevotella_tannerae	-0.0343055	0.037125408716924	0.360086192080629
OPLL	s_unclassified_Clostridium_sp._D5	0.0263071987172751	0.0239216499296957	0.276937711935224

## Sheet: Supplementary Table S3
Supplementary Table 3: MR analysis of Metabolites and OPLL
exposure	outcome	method	nsnp	b	se	pval	lo_ci	up_ci	or	or_lci95	or_uci95
dehydroepiandrosterone	OPLL	Inverse variance weighted	12	-0.351848	0.142687997361338	0.0136687199072468	-0.631516	-0.0721792	0.703387234159199	0.531784906386744	0.930364128872651
HR	OPLL	Inverse variance weighted	14	-0.930639	0.385331316969169	0.015728055225544	-1.68589	-0.17539	0.394301687542123	0.185279767487326	0.839130051311197
monocytes-percentage	OPLL	Inverse variance weighted	19	-0.471299	0.202289533155586	0.0198155649781164	-0.867786	-0.0748111	0.624191173898441	0.419880104433678	0.927918749801718
red-blood-cell-distribution	OPLL	Inverse variance weighted	38	0.966070407125323	0.428721578161036	0.0242355260800295	0.125776113929692	1.80636470032095	2.62759875212453	1.13402824673156	6.08827445177449
Aspartic_acid	OPLL	Inverse variance weighted	20	0.39894171054644	0.181104108678543	0.0276066756873458	0.0439776575364949	0.753905763556385	1.49024675040693	1.04495900766913	2.12528468657556
Manganese	OPLL	Inverse variance weighted	19	0.279520180828747	0.133076638861998	0.0356897007278583	0.0186899686592306	0.540350392998264	1.3224951015728	1.01886571934092	1.71660824432823
Cystine	OPLL	Inverse variance weighted	45	-0.0785527	0.0388262811749394	0.0430543401867234	-0.154652	-0.00245314	0.924453385486319	0.856713123167745	0.997549866841228
VB2	OPLL	Inverse variance weighted	24	-0.100519	0.0509394877572541	0.0484613072676746	-0.20036	-0.000677534	0.904367993003034	0.81843579663744	0.999322695962979
HETEROGENEITY
exposure	outcom	method	Q	Q_df	Q_pval
dehydroepiandrosterone	OPLL	MR Egger	3.71839992952331	10	0.959157629626489
dehydroepiandrosterone	OPLL	IVW	4.66501063373522	11	0.94629894487058
HR	OPLL	MR Egger	8.20714011473918	12	0.768740778384437
HR	OPLL	IVW	8.78187807174259	13	0.789210491693183
monocytes-percentage	OPLL	MR Egger	12.4692082827951	17	0.770930563371684
monocytes-percentage	OPLL	IVW	12.4708453362157	18	0.822000831038559
red-blood-cell-distribution	OPLL	MR Egger	45.2395183481351	36	0.139024691143599
red-blood-cell-distribution	OPLL	IVW	45.3523871011082	37	0.162938004851365
Aspartic_acid	OPLL	MR Egger	20.7488191507473	18	0.292274316196361
Aspartic_acid	OPLL	IVW	20.818161304912	19	0.34693487480399
Manganese	OPLL	MR Egger	10.1445223698244	17	0.897440512187431
Manganese	OPLL	IVW	12.6267804599114	18	0.813250580537115
Cystine	OPLL	MR Egger	28.4335730900491	43	0.957292869604312
Cystine	OPLL	IVW	28.8705496861548	44	0.961917946570219
VB2	OPLL	MR Egger	10.9594480079864	22	0.975322362766304
VB2	OPLL	IVW	11.0384975410351	23	0.982792192014018
HORIZONTAL PLEIOTROPY
exposure	outcom	egger_intercept	se	pval
dehydroepiandrosterone	OPLL	0.0364491087588843	0.0374628840378961	0.353529635145869
HR	OPLL	0.0339732648065909	0.0448128272321372	0.46301169418018
monocytes-percentage	OPLL	-0.00131429	0.032483226434883	0.968197370787079
red-blood-cell-distribution	OPLL	0.00688544755920522	0.022974869193971	0.766133619082213
Aspartic_acid	OPLL	-0.0082947	0.0338191421597883	0.809024630165763
Manganese	OPLL	-0.0448777	0.0284844213154408	0.133562440851818
Cystine	OPLL	0.0132282376056286	0.020011189214802	0.512111791573522
VB2	OPLL	-0.00727027	0.0258583562562287	0.781216998647434

## Sheet: Supplementary Table S4
Supplementary Table 4: MR analysis of Gut microbiome and Blood metabolites
exposure	outcome	method	nsnp	b	se	pval	lo_ci	up_ci	or	or_lci95	or_uci95
c_Bacilli	Manganese	IVW	26	0.0450234180150407	0.0159231870898812	0.0046907434692868	0.0138139713188735	0.0762328647112079	1.0460523560917	1.01390982508584	1.07921385572169
g_Megasphaera	Aspartic_acid	IVW	30	-0.0154392	0.00735953978356915	0.0359179733824116	-0.0298639	-0.00101455	0.984679328237494	0.970577577585703	0.998985966552093
MF0036	Cystine	IVW	23	-0.148658	0.0595872530523125	0.0126030306540451	-0.265449	-0.0318669	0.861863894525125	0.76686160416567	0.968635499092664
MF0052	VB2	IVW	18	0.0502346794118892	0.0235661133008311	0.0330357208616223	0.00404509734226011	0.0964242614815182	1.05152	1.00405328979121	1.10122617274638
MF0074	VB2	IVW	17	-0.585738	0.275791874547928	0.0336834259357771	-1.12629	-0.0451861	0.556694790691246	0.324233865836799	0.955819618604433
s_Prevotella_oris	Aspartic_acid	IVW	14	0.0447099719512096	0.0182586581835347	0.0143372902679421	0.00892300191148161	0.0804969419909375	1.04572452647925	1.00896293056583	1.08382553228888
HETEROGENEITY
exposure	outcome	method	Q	Q_df	Q_pval
c_Bacilli	Manganese	MR Egger	25.8372499821911	24	0.361474413902394
c_Bacilli	Manganese	IVW	27.0771927709933	25	0.352039162473572
g_Megasphaera	Aspartic_acid	MR Egger	34.1115231009532	28	0.197225500252083
g_Megasphaera	Aspartic_acid	IVW	34.1148417680829	29	0.235081057781232
MF0036	Cystine	MR Egger	15.3113983736081	21	0.807008667523784
MF0036	Cystine	IVW	16.9209665910334	22	0.767708830495496
MF0052	VB2	MR Egger	16.223188812288	16	0.437495349118038
MF0052	VB2	IVW	16.6864571641247	17	0.475796776026113
MF0074	VB2	MR Egger	17.2592271502445	15	0.303605468226664
MF0074	VB2	IVW	17.3139346621831	16	0.365569128617847
s_Prevotella_oris	Aspartic_acid	MR Egger	13.804853762996	12	0.313343244733065
s_Prevotella_oris	Aspartic_acid	IVW	15.1428929165285	13	0.298517436118384
HORIZONTAL PLEIOTROPY
exposure	outcome	egger_intercept	se	pval
c_Bacilli	Manganese	-0.0096922	0.00903106838409394	0.293851264001173
g_Megasphaera	Aspartic_acid	0.00044061350607797	0.00844204180603325	0.958745684207218
MF0036	Cystine	-0.0182098	0.0143532797834224	0.218435912288464
MF0052	VB2	0.019684370658614	0.0291214729817657	0.508731847099596
MF0074	VB2	-0.00610907	0.0280166806194629	0.830327880564056
s_Prevotella_oris	Aspartic_acid	-0.0133693	0.0123965062307919	0.302024521112527

## Sheet: Supplementary Table S5
Supplementary Table 5. Mediation effects and mediation ratio of metabolites
exposure	β1	Mediation	β2	Outcome	Mediation effect(95% CI)	Total effect	Mediation ratio(%)
Bacilli	0.045	Manganese	0.2795	OPLL	0.0126 (-0.00204, 0.0272)	1.1339 (1.0299,1.2484)	10%(-1.63%, 21.6%)
Megasphaera	-0.0154	Aspartic acid	0.3989	OPLL	-0.00616 (-0.0141, 0.00179)	1.0436(1.0011, 1.0879)	-14.4%(-33%,4.18%)
Prevotella oris	0.0447	Aspartic acid	0.3989	OPLL	0.0178(-0.00351, 0.0392)	0.8816(0.7814, 0.9946)	-14.2%(2.79%,31.1%)
MF0036	-0.1486	Cystine	-0.0785	OPLL	0.0117(-0.00289, 0.0262)	1.4580(1.1217, 1.8951)	3.1%(-0.766%, 6.96%)
MF0052	0.0502	VB2	-0.1005	OPLL	-0.00505(-0.0119, 0.00179)	1.0624(1.0020, 1.1264)	-8.33%(-19.6%, 2.95%)
MF0074	-0.5857	VB2	-0.1005	OPLL	0.0589(-0.0209, 0.139)	2.2666(1.2910, 3.9794)	7.2%(-2.56%, 17%)
